# Supplementary material for: A somatic proteoglycan controls Notch-directed germ cell fate
Source: PubMed Central journal article supplement (PMC8602670; doi:10.1038/s41467-021-27039-4), 2021-11-18

1  
2  
3  
4  
5  
6  
7  
8  
9  
10  
11  
12  
13  
14  
15  
16  
17  
18  
19  
20  
21

Supplementary Materials for

**A Somatic Proteoglycan Controls Notch-Directed Germ Cell Fate**

Sandeep Gopal\*, Aqilah Amran, Andre Elton, Leelee Ng and Roger Pocock\*

Correspondence to: [roger.pocock@monash.edu](mailto:roger.pocock@monash.edu) and [sandeep.gopal@monash.edu](mailto:sandeep.gopal@monash.edu)

**This PDF file includes:**

- Figures. S1 to S10
- Table S1

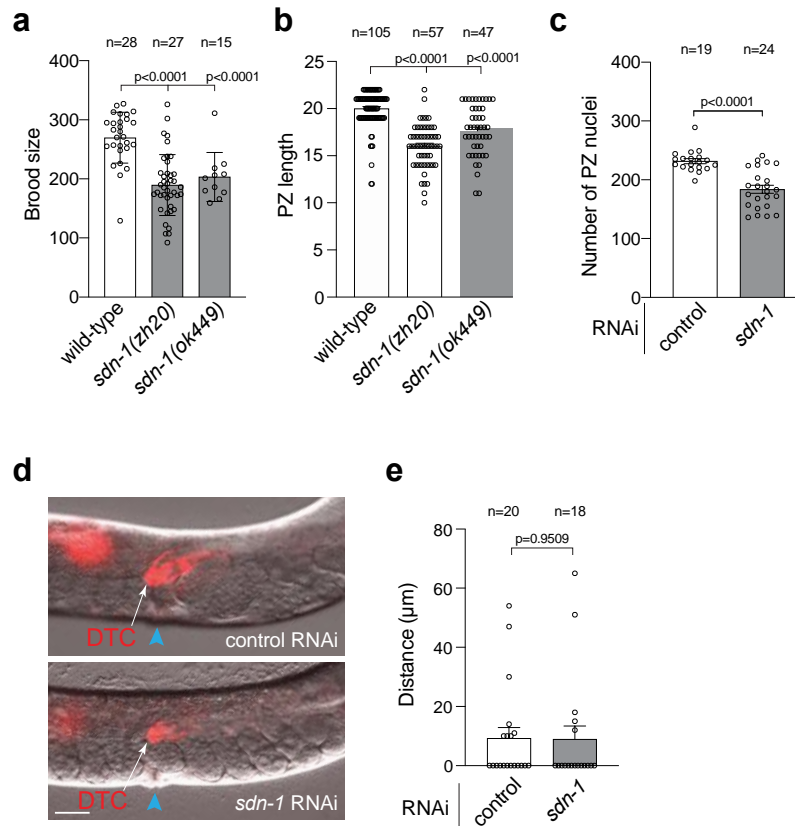

22  
23

24 **Fig. S1. *sdn-1* loss-of-function germline analysis**

25 (A) Brood size of wild-type, *sdn-1(zh20)* and *sdn-1(ok449)* hermaphrodites. Data are  
26 expressed as mean ± s.e.m. and statistical significance was assessed by ordinary one-  
27 way ANOVA.

28 (B) PZ length of wild-type, *sdn-1(zh20)* and *sdn-1(ok449)* adult hermaphrodites. Data  
29 are expressed as mean ± s.e.m. and statistical significance was assessed by ordinary  
30 one-way ANOVA.

31 (C) 3D germline quantification of PZ nuclei in adult hermaphrodite (+/- *sdn-1* RNAi).  
32 Data are expressed as mean ± s.e.m. and statistical significance was assessed by two-  
33 tailed unpaired t-test.

34 (D-E) Immunofluorescence images (D) and quantification (E) distal tip cell position in  
35 adult hermaphrodites (+/- *sdn-1* RNAi) with respect to vulva (blue arrowhead). Data are  
36 expressed as mean ± s.e.m. and statistical significance was assessed by two-tailed  
37 unpaired t-test. For all panels, n refers to number of animals analyzed. P-values as  
38 indicated.

39  
40  
41

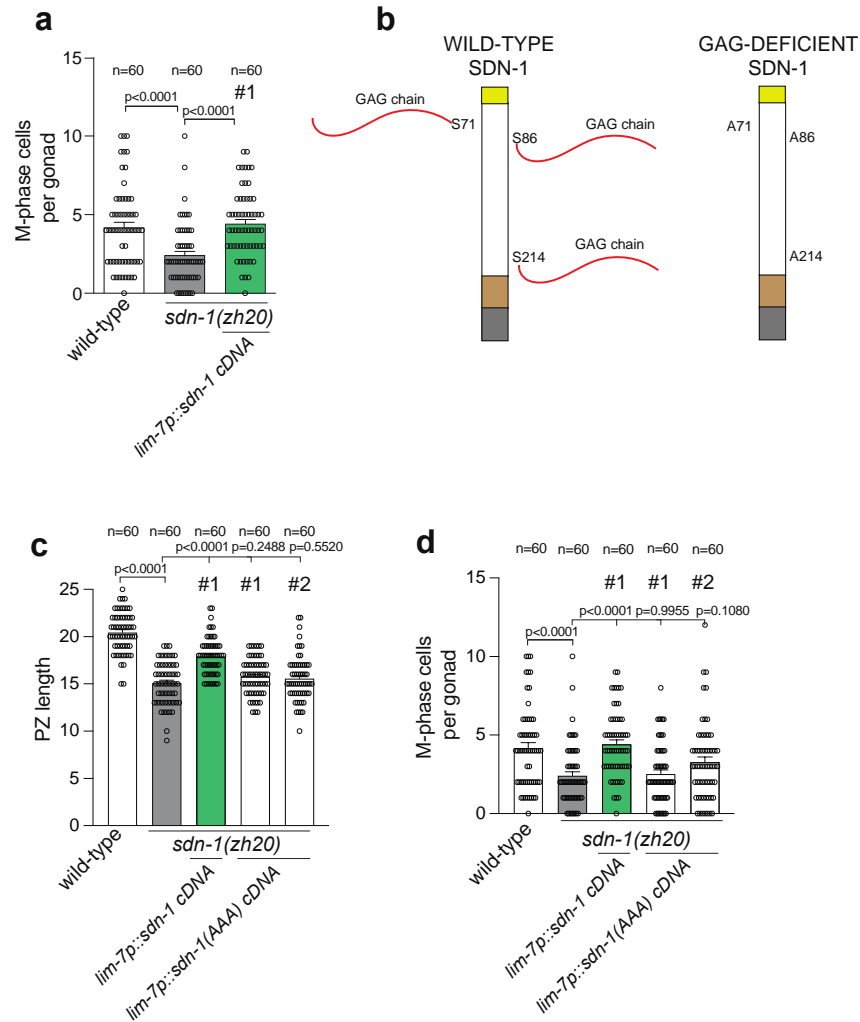

42

43

44 **Fig. S2. *sdn-1* mutant rescue experiments**

45 (A) Quantification of M-phase cells in distal germlines of wild-type, *sdn-1(zh20)* and *sdn-1(zh20); lim-7p::sdn-1 cDNA* adult hermaphrodites. The *lim-7p::sdn-1 cDNA* rescue line corresponds to the same line in Figure 1F. Data are expressed as mean  $\pm$  s.e.m. and statistical significance was assessed by ordinary one-way ANOVA.

49 (B) Schematic of wild-type SDN-1 and GAG-deficient SDN-1. Attachment sites (S71, S86 and S214) are shown with GAG chains as red lines in wild-type. Alanine mutations that prevent GAG attachment are shown in the GAG-deficient SDN-1. Yellow - signal sequence; White - ectodomain; Brown - transmembrane domain; Grey - cytoplasmic domain.

54 (C) Quantification of PZ length in distal germlines of adult hermaphrodites in wild-type, *sdn-1(zh20)* and *sdn-1(zh20); lim-7p* rescue lines expressing wild-type SDN-1 or GAG-chain deficient SDN-1(AAA). Independent rescue lines represented by # (#1 line for wild type SDN-1 corresponds to the same line in Figure 1F). Data are expressed as mean  $\pm$  s.e.m. and statistical significance was assessed by ordinary one-way ANOVA.

59 (D) Quantification of M-phase cells in distal germlines of adult hermaphrodites in wild-  
60 type, *sdn-1(zh20)* and *sdn-1(zh20); lim-7p* rescue lines expressing wild-type SDN-1 or  
61 GAG-chain deficient SDN-1(AAA). Independent rescue lines represented by # (#1 line  
62 for wild type SDN-1 corresponds to the same line in Figure 1F). Data are expressed as  
63 mean  $\pm$  s.e.m. and statistical significance was assessed by ordinary one-way ANOVA.  
64 For all panels, n refers to number of animals analyzed. P-values as indicated.

65

66

67  
68  
69  
70  
71  
72  
73  
74  
75  
76  
77  
78  
79  
80  
81  
82  
83  
84  
85  
86  
87  
88  
89  
90  
91

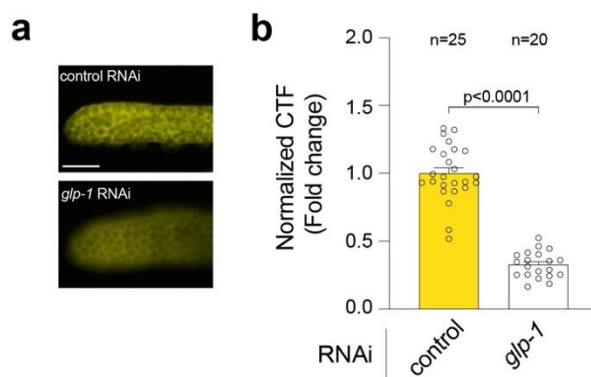

**Fig. S3. Validation of *glp-1* RNAi**

(A-B) Immunofluorescence images (A) and quantification (B) of GLP-1::V5 expression in the PZ of wild-type (+/- *glp-1* RNAi). Data are expressed as mean  $\pm$  s.e.m. and statistical significance was assessed by two-tailed unpaired t-test. Scale bar 20 $\mu$ m. n refers to number of animals analyzed. P-values as indicated.

92  
93  
94  
95  
96  
97  
98  
99  
100  
101  
102  
103  
104

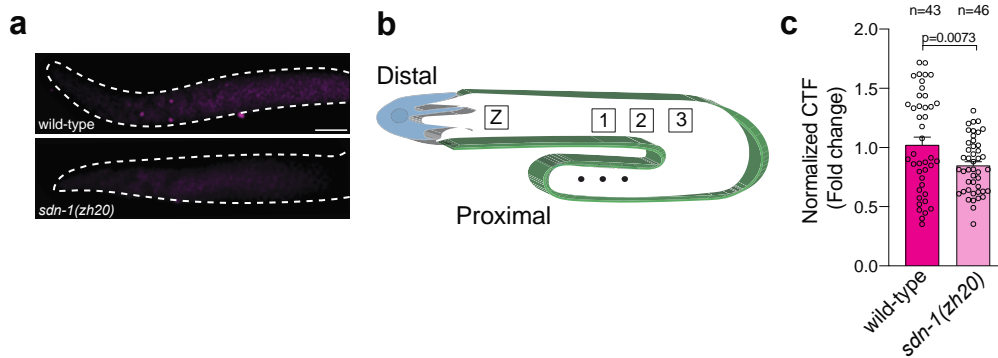

105  
106  
107  
108  
109  
110  
111  
112  
113  
114  
115  
116  
117  
118  
119

**Fig. S4. *glp-1* transcript analysis by smFISH**

(A-C) Immunofluorescence images (A), schematic of image analysis (B) and quantification (C) of *glp-1* smFISH expression in the PZ of wild-type and *sdn-1(zh20)* adult hermaphrodites. *glp-1* transcripts = magenta (A). smFISH signal was quantified from three areas (boxes 1-3) while considering an area in the distal end as the background (box Z) (B). Data are expressed as mean  $\pm$  s.e.m. and statistical significance was assessed by two-tailed unpaired t-test. Scale bar = 20 $\mu$ m. n refers to number of animals analyzed. P-value as indicated.

120  
121  
122  
123  
124  
125  
126  
127  
128  
129

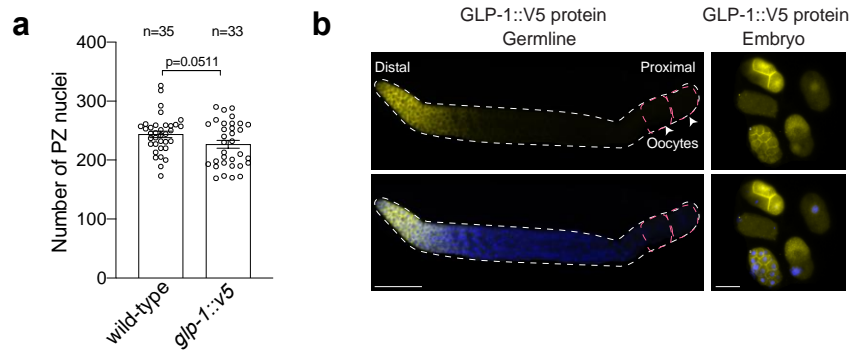

130  
131  
132  
133  
134  
135  
136  
137  
138  
139  
140  
141

**Fig. S5. Analysis of CRISPR-Cas9 generated GLP-1::V5 strain**

(A) Quantification of PZ nuclei of wild-type and CRISPR-Cas9-tagged *glp-1::v5* adult hermaphrodites. Data are expressed as mean  $\pm$  s.e.m. and statistical significance was assessed by two-tailed unpaired t-test. P-value as indicated. n refers to number of animals analyzed.

(B) Images of GLP-1::V5 in adult germlines and embryos. 30 germlines and 20 embryos were analysed. Performed in duplicate. Scale bars = 25 $\mu$ m.

142  
143  
144  
145  
146  
147  
148  
149  
150  
151  
152  
153  
154  
155  
156  
157

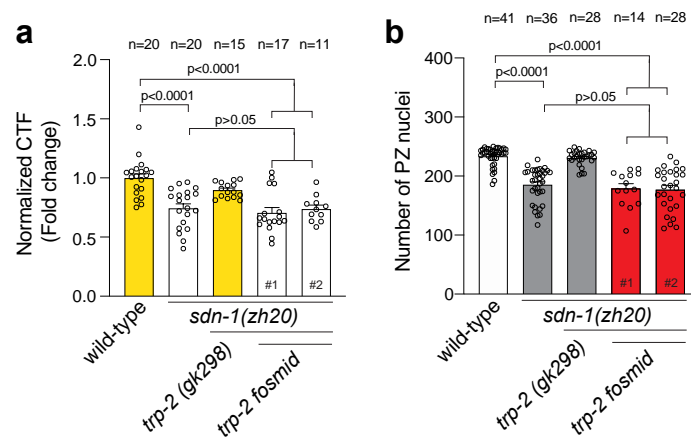

158  
159  
160

**Fig. S6. *trp-2* fosmid rescue analysis**

161 (A) Quantification of GLP-1::V5 protein in wild-type, *sdn-1(zh20)* and *sdn-1(zh20); trp-*  
162 *2(gk298)* (+/- *trp-2* fosmid) in adult hermaphrodite germlines. Data are expressed as  
163 mean ± s.e.m. and statistical significance was assessed by ordinary one-way ANOVA.

164 (B) Quantification of PZ nuclei in wild-type, *sdn-1(zh20)* and *sdn-1(zh20); trp-2(gk298)*  
165 (+/- *trp-2* fosmid) in adult hermaphrodite germlines. Data are expressed as mean ±  
166 s.e.m. and statistical significance was assessed by ordinary one-way ANOVA. n refers  
167 to number of animals analyzed. P-values as indicated.

168



169  
170  
171  
172  
173  
174  
175  
176  
177  
178

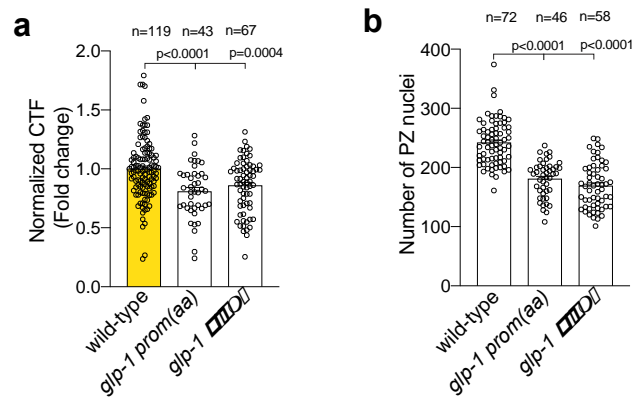

179 **Fig. S7. *glp-1* promoter analysis**

180 (A) Quantification of GLP-1::V5 protein in wild-type, *glp-1prom(aa)* and *glp-1promΔ*  
181 adult hermaphrodite germlines. Data are expressed as mean  $\pm$  s.e.m. and statistical  
182 significance was assessed by ordinary one-way ANOVA.

183 (B) Quantification of PZ nuclei in wild-type, *glp-1prom(aa)* and *glp-1promΔ* adult  
184 hermaphrodites. Data are expressed as mean  $\pm$  s.e.m. and statistical significance was  
185 assessed by ordinary one-way ANOVA. n refers to number of animals analyzed. P-  
186 values as indicated.

187

188  
189  
190  
191  
192  
193  
194  
195  
196  
197

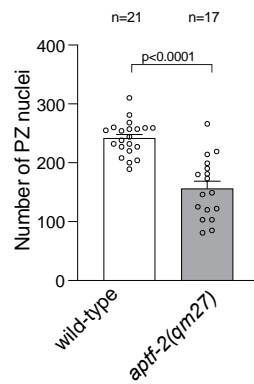

198  
199  
200  
201  
202  
203  
204  
205  
206

**Fig. S8. PZ nuclei analysis of *aptf-2(qm27)* animals**

Quantification of PZ nuclei in wild-type and *aptf-2(qm27)* adult hermaphrodites. Data are expressed as mean  $\pm$  s.e.m. and statistical significance was assessed by two-tailed unpaired t-test. n refers to number of animals analyzed. P-value as indicated.

207  
208  
209  
210  
211  
212  
213  
214

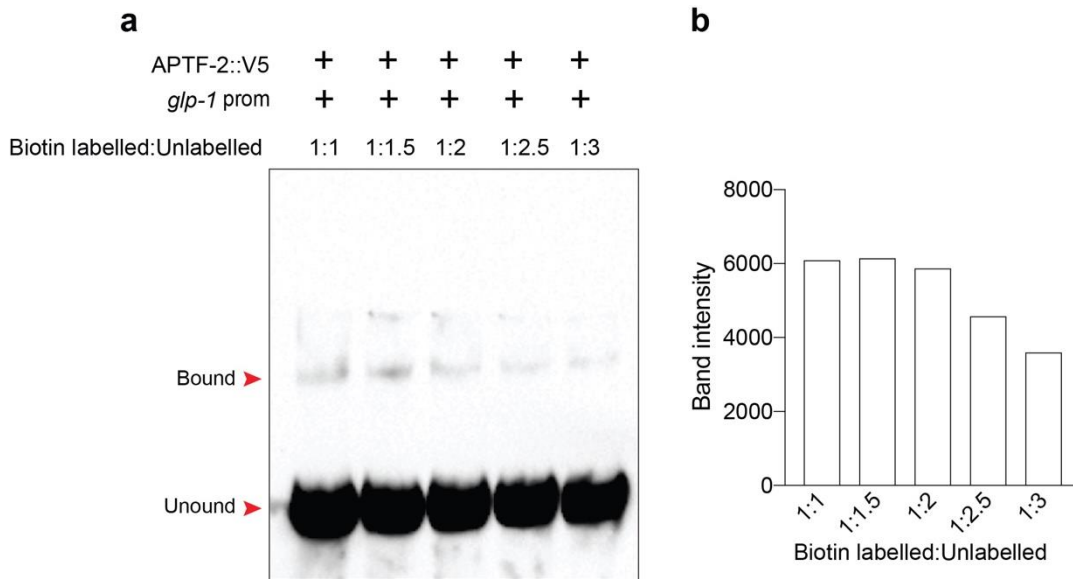

215  
216  
217  
218  
219  
220  
221  
222  
223  
224  
225

**Fig. S9. *glp-1* EMSA analysis**

(A-B) EMSA competition experiments. APTF-2::V5 protein produced in HEK293T cells and the TFAP2 consensus motif in the *glp-1* promoter (A). DNA bound and unbound with APTF-2::V5 is marked. Biotin-labelled wild-type *glp-1* promoter is competed away with increasing amount of unlabeled *glp-1* promoter. Quantification of shifted *glp-1* promoter with increasing amount of unlabeled *glp-1* promoter (B).

a

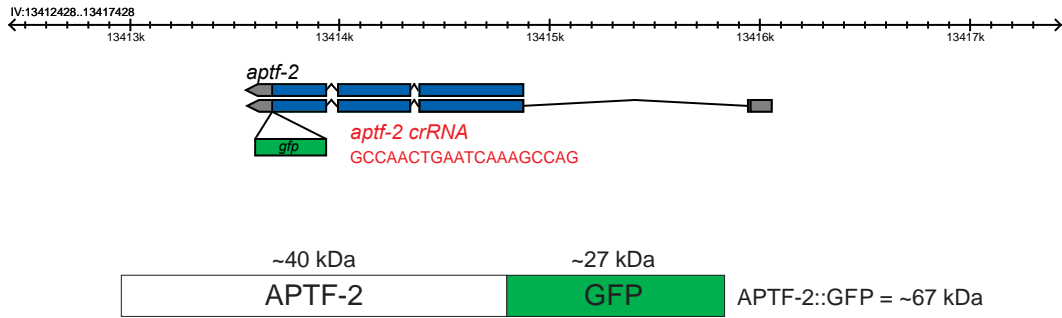

b

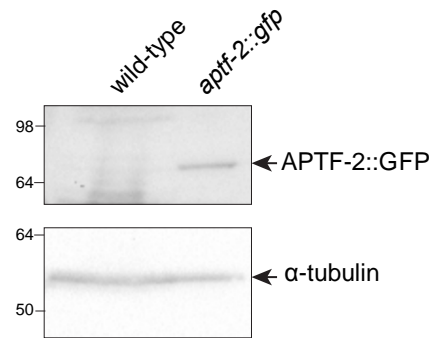

c

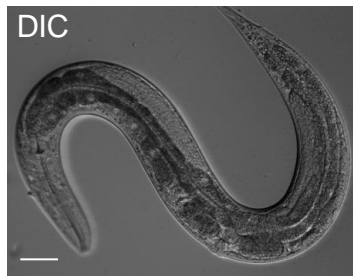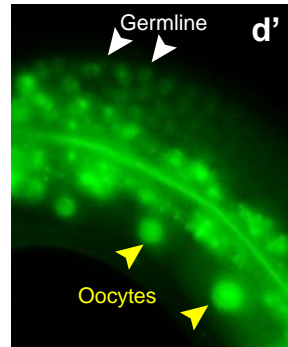

d

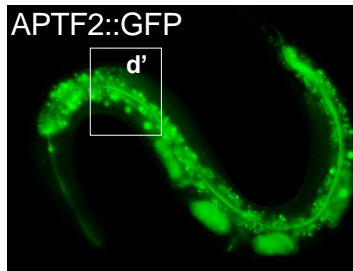

226

227 **Fig. S10. APTF-2::GFP expression analysis**

228 (A) *aptf-2* genomic locus (upper image) showing 3'-end tagging of the gene (crRNA  
229 used for Cas9 cleavage in red). Schematic of APTF-2 protein (lower image) showing

230 approximate molecular weight of the fusion protein following CRISPR/Cas9 insertion of  
231 GFP.

232 (B) Western blot of endogenously tagged APTF-2::GFP from mixed-stage worms.  
233 APTF-2::GFP protein is the correct size (APTF-2 = ~40kDa, GFP = 27kDa, combined =  
234 ~67kDa). Top blot - anti-GFP antibody; bottom blot - anti-tubulin loading control.  
235 Performed in duplicate.

236 (C-D) Endogenous APTF-2::GFP expression in the adult hermaphrodite germline. DIC  
237 image of a young adult hermaphrodite (C), fluorescence image of the same worm (D)  
238 and zoomed image of the boxed region (D') showing expression in the germline (white  
239 arrowheads) and oocytes (yellow arrowheads). Scale bar = 50µm.

240  
241  
242  
243

**Table S1. Materials used.**

| <b>Reagents</b>                                                      | <b>Company</b>                             | <b>Catalogue number</b> |
|----------------------------------------------------------------------|--------------------------------------------|-------------------------|
| Formaldehyde (37%)                                                   | Sigma                                      | F8775                   |
| Lipofectamine 2000                                                   | Thermo Fisher                              | 11668019                |
| UltraPure™ Agarose                                                   | Thermo Scientific                          | 16500-500               |
| Ampicillin sodium salt                                               | Sigma                                      | A9518                   |
| DMEM                                                                 | Life Technologies                          | 11960044                |
| L-glutamine                                                          | Life Technologies                          | 25030-081               |
| Fluoroshield                                                         | Sigma Aldrich                              | F6182                   |
| Formamide, Deionized                                                 | Merck Millipore                            | S4117                   |
| DAPI readymade solution                                              | Sigma Aldrich                              | MBD0015                 |
| Alexa Fluor™ Plus 555 Phalloidin                                     | Thermofisher                               | A30106                  |
| Goat serum (10mL)                                                    | Sigma Aldrich                              | G9023                   |
| Epstein-Barr Nuclear Antigen (EBNA)                                  | Thermofisher                               | Part of 20148           |
| <b>Antibody</b>                                                      | <b>Company</b>                             | <b>Catalogue number</b> |
| Mouse monoclonal anti-V5 (clone SV5-pk1) (1:1000)                    | BioRad                                     | MCA1630                 |
| Mouse monoclonal anti- $\alpha$ -tubulin (clone 12G10) (1:200)       | Developmental<br>Studies Hybridoma<br>Bank | AB1157911               |
| Mouse-polyclonal anti-GFP (1:1000)                                   | Sigma Aldrich                              | 11814460001             |
| Rabbit-monoclonal anti-pH3 (1:1000)                                  | Sigma Aldrich                              | 06570                   |
| Goat anti-Mouse IgG (H+L) Secondary Antibody, HRP conjugate (1:1000) | Life Technologies                          | 32430                   |
| <b>Bacterial strain</b>                                              | <b>Source</b>                              | <b>Identifier</b>       |
| Bacteria <i>Escherichia coli</i> HT115                               | CAENORHABDITIS<br>GENETICS CENTER<br>(CGC) | N/A                     |
| Bacteria <i>Escherichia coli</i> OP50                                | CGC                                        | N/A                     |
| <b><i>C. elegans</i> strain</b>                                      | <b>Source</b>                              | <b>Identifier</b>       |
| <i>sdn-1(zh20)</i>                                                   | CGC                                        | AH205                   |
| <i>trp-2(gk298)</i>                                                  | CGC                                        | VC602                   |
| <i>glp-1::v5(q1000)</i>                                              | Kimble lab                                 | JK5933                  |
| <i>sdn-1(ok449)</i>                                                  | CGC                                        | RB690                   |
| <i>sdn-1(zh20); trp-2(gk298) glp-1::v5(q1000)</i>                    | This study                                 | RJP3846                 |
| <i>sdn-1(zh20); rpls121(lim-7p::sdn-1::gfp::tbb-2)</i> line 1        | This study                                 | RJP3867                 |
| <i>sdn-1(zh20); rpls121(lim-7p::sdn-1::gfp::tbb-2)</i> line 2        | This study                                 | RJP3866                 |
| <i>sdn-1(zh20); rpls154(mex-5p::sdn-1::gfp::tbb-2)</i> line 1        | This study                                 | RJP3857                 |
| <i>sdn-1(zh20); rpls154(mex-5p::sdn-1::gfp::tbb-2)</i> line 2        | This study                                 | RJP3855                 |

|                                                                                   |                |                         |
|-----------------------------------------------------------------------------------|----------------|-------------------------|
| <i>sdn-1(zh20) rpls114(lag-2p::sdn-1::gfp::tbb-2)</i> line 1                      | This study     | RJP3863                 |
| <i>sdn-1(zh20); rpls114(lag-2p::sdn-1::gfp::tbb-2)</i> line 2                     | This study     | RJP3858                 |
| <i>sdn1(zh20); rpls157(lim-7p::sdn-1SA::gfp::tbb-2)</i> line 1                    | This study     | RJP3746                 |
| <i>sdn1(zh20); rpls157(lim-7p::sdn-1SA::gfp::tbb-2)</i> line 2                    | This study     | RJP3747                 |
| <i>sdn-1(zh20); glp-1::v5(q1000)</i>                                              | This study     | RJP3845                 |
| <i>trp-2(gk298) glp-1::v5(q1000)</i>                                              | This study     | RJP4118                 |
| <i>glp-1::v5(q1000)promΔ</i>                                                      | This study     | RJP4729                 |
| <i>sdn1(zh20); glp-1::V5(q1000)promΔ</i>                                          | This study     | RJP4730                 |
| <i>glp-1::v5(q1000)prom(aa)</i>                                                   | This study     | RJP4744                 |
| <i>glp1::v5(q1000); aptf-2::gfp</i>                                               | This study     | RJP4035                 |
| <i>sdn-1(zh20); glp-1::V5(q1000); aptf-2::gfp</i>                                 | This study     | RJP4731                 |
| <i>glp-1::v5(q1000); rpEx2183(sdn-1p::gfp)</i>                                    | This study     | RJP5186                 |
| <i>glp-1::v5(q1000); rpEx2184(lim-7p::gfp)</i>                                    | This study     | RJP5187                 |
| <i>sdn-1(zh20); glp-1::v5(q1000); rpEx2184(lim-7p::gfp)</i>                       | This study     | RJP5188                 |
| <i>trp-2p::mCherry (IskEx383)</i>                                                 | PMID: 29883446 | KHK667                  |
| <i>sdn-1(zh20); trp-2(gk298) glp-1::v5(q1000); rpEx2185(lim-7p::trp-2)</i> line 1 | This study     | RJP5189                 |
| <i>sdn-1(zh20); trp-2(gk298) glp-1::v5(q1000); rpEx2186(lim-7p::trp-2)</i> line 2 | This study     | RJP5190                 |
| <i>qls154 [lag-2p::MYR::tdTomato + ttx-3p::GFP] V</i>                             | PMID: 24586318 | JK4472                  |
| <b>Mammalian Cell Lines</b>                                                       | <b>Source</b>  | <b>Identifier</b>       |
| HEK293T                                                                           | N/A            | N/A                     |
| Wild-type mouse embryonic fibroblast (MEF)                                        | N/A            | N/A                     |
| Syndecan-4 knockout MEF                                                           | N/A            | N/A                     |
| <b>Commercial Kit</b>                                                             | <b>Company</b> | <b>Catalogue number</b> |
| LightShift™ Chemiluminescent EMSA Kit                                             | Thermofisher   | 20148                   |
| Pierce™ Biotin 3' End DNA Labelling Kit                                           | Thermofisher   | 89818                   |
| NE-PER™ Nuclear and Cytoplasmic Extraction Reagents                               | Thermofisher   | 78833                   |
| <b>Plasmid</b>                                                                    | <b>Source</b>  | <b>Identifier</b>       |
| <i>pCDNA3.2-aptf-2-v5</i>                                                         | This study     | N/A                     |
| <i>minimos-mex-5p::sdn-1::tbb-2-UTR</i>                                           | Bulow lab      | N/A                     |
| <i>minimos-lag-2p::sdn-1::tbb-2-UTR</i>                                           | Bulow lab      | N/A                     |
| <i>minimos-lim-7p::sdn-1::tbb-2-UTR</i>                                           | Bulow lab      | N/A                     |
| <i>rab-3p::mCherry::unc-54UTR</i>                                                 | This study     | N/A                     |
| <i>myo-2p::mCherry::unc-54UTR</i>                                                 | This study     | N/A                     |
| <i>myo-3p::mCherry::unc-54UTR</i>                                                 | This study     | N/A                     |

|                                                                                            |               |                   |
|--------------------------------------------------------------------------------------------|---------------|-------------------|
| <i>eft-3p::mos1transposase::tbb-2UTR</i>                                                   | This study    | N/A               |
| <i>hsp16.41p::peel-1::tbb-2UTR</i>                                                         | This study    | N/A               |
| <i>sdn-1p::gfp</i>                                                                         | This study    | N/A               |
| <i>lim-7p::gfp</i>                                                                         | This study    | N/A               |
| <i>lim-7p::trp-2 cDNA</i>                                                                  | This study    | N/A               |
| <b>Oligonucleotide</b>                                                                     | <b>Source</b> | <b>Identifier</b> |
| <i>glp-1-prom</i> F<br>5'aacacactcagaaaatgggCGGAGTATGCCACCCGGCCTTCATTCGTCGCT<br>CCTGTCTT3' | This study    | oSG168            |
| <i>glp-1-prom</i> R<br>5'aagacaaggagcgacgaatgaaggccgggtggcactactccgccattttc<br>tgagtgttt3' | This study    | oSG169            |
| <i>glp-1-prom</i> Δ F<br>5'aacacactcagaaaatgggCGGAGTATGCGGCCTTCATTCGTCGCTCCTGTCTT<br>TT3'  | This study    | oSG170            |
| <i>glp-1-prom</i> Δ R<br>5'aagacaaggagcgacgaatgaaggccgcactactccgccattttctgagt<br>gtgtt3'   | This study    | oSG171            |
| Control DNA duplex<br>5'tagcatatgcta3'<br>3'atcgatacga5'                                   | Thermofisher  | Part of 20148     |
| crRNA for <i>aptf-2-gfp</i><br>gccaaactgaatcaaagccag                                       | This study    | N/A               |
| crRNA for <i>glp-1</i> mutations<br>aatgggCGGAGTATGCCACC                                   | This study    | N/A               |
| <i>sdn-1</i> promoter F<br>5'gaaatgaaataagctttcacctgatagcgcgtaacg3'                        | This study    | N/A               |
| <i>sdn-1</i> promoter R<br>5'ccaatcccggggatccattgtctgttggtgtaacacc3'                       | This study    | N/A               |
| <i>lim-7p::gfp</i> reporter F<br>5'cgactctagaggatcagtactgtgccttgattctcctg3'                | This study    | N/A               |
| <i>lim-7p::gfp</i> reporter R<br>5'tcatttttctaccgccaatcgacagccggcac3'                      | This study    | N/A               |
| <i>lim-7p::trp-2</i> F<br>5'aggacccttggtagcatgacatcatcagaagcatccgag3'                      | This study    | N/A               |



|                                                                       |                                   |                   |
|-----------------------------------------------------------------------|-----------------------------------|-------------------|
| <i>lim-7p::trp-2</i> R<br>5'gatatcaataccatgggcataaaagttcatcagtgctgc3' | This study                        | N/A               |
| <b>Software</b>                                                       | <b>Source</b>                     | <b>Identifier</b> |
| ImageJ 1.47n                                                          | National Institute of Health, USA | N/A               |
| Imaris 9.1.2                                                          | Bitplane                          | N/A               |

246

247

248

249

250

## Uncropped blots

All blots were detected by biotin labelling of oligos and chemiluminescent EMSA kit as explained in supplementary materials.

Figure S9A

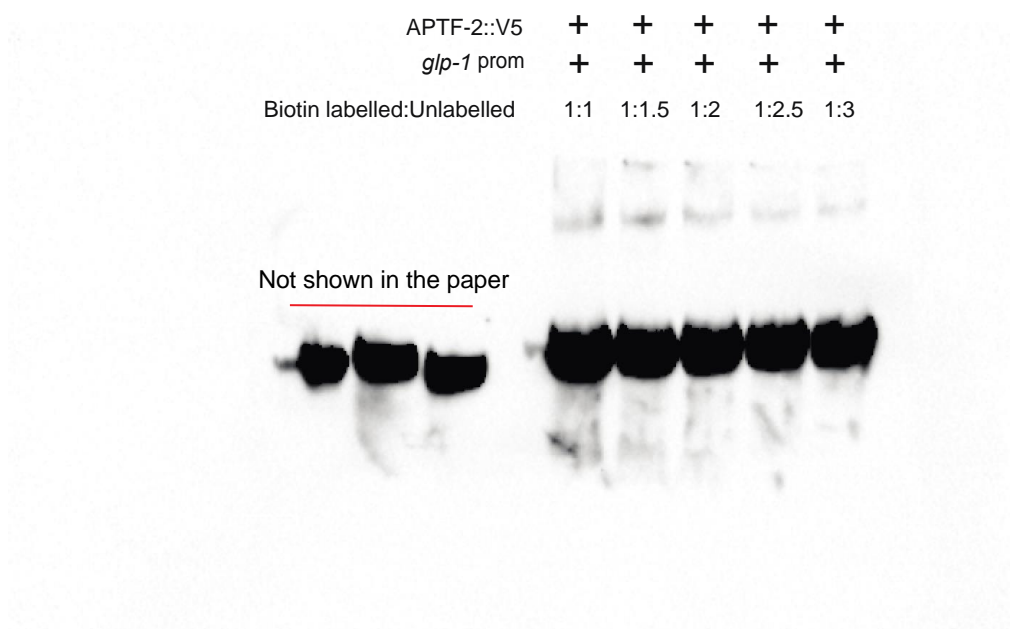

251

252

## Uncropped images of Western blots detecting APTF-2::GFP

Supplementary Figure 10B - Top panel high exposure

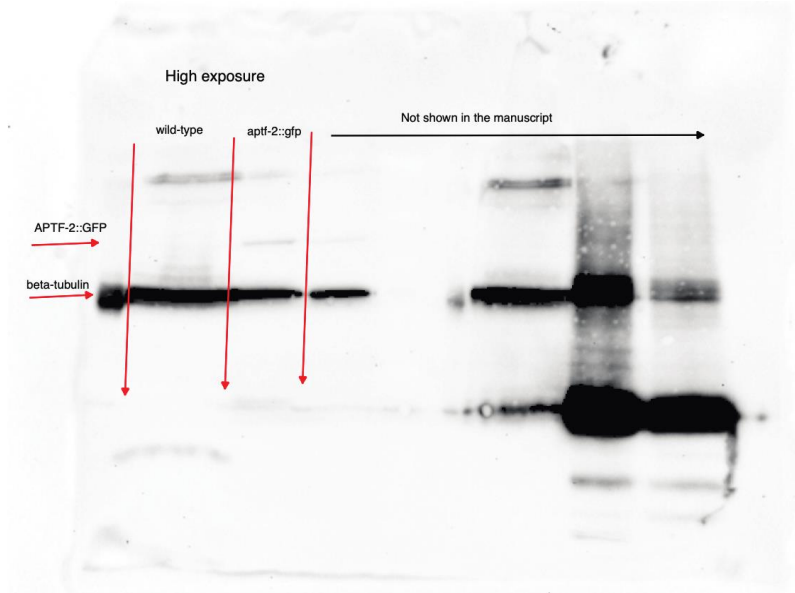

Supplementary Figure 10B - Bottom panel low exposure

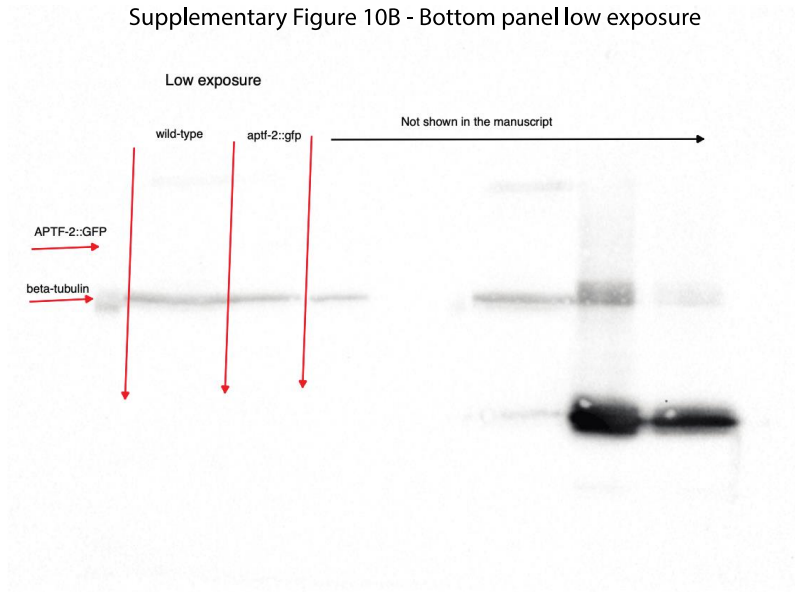

Supplement: 41467_2021_27039_MOESM1_ESM.pdf [file 41467_2021_27039_MOESM1_ESM.pdf]
